# Supplementary material for: XcisClique: analysis of regulatory bicliques
Source: PubMed Central journal article supplement (PMC1513260; doi:10.1186/1471-2105-7-218), 2006-04-21
Supplement: 1471-2105-7-218-S1.pdf [file 1471-2105-7-218-S1.pdf]

## Supplementary Figures

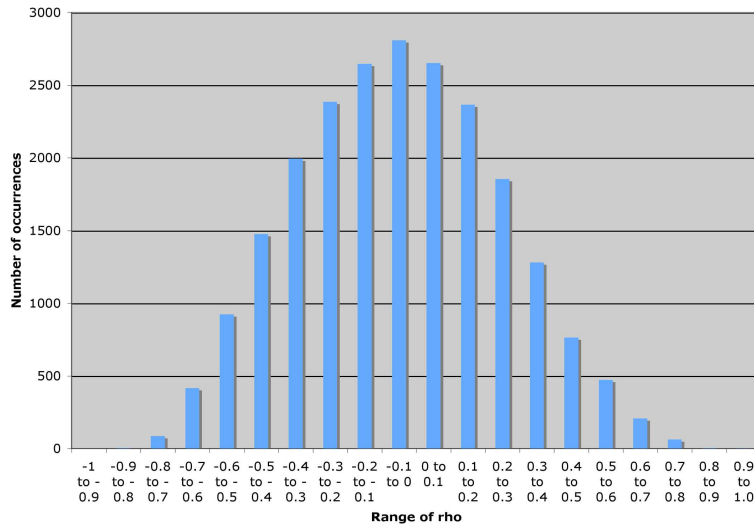

Supplementary Figure 1: Distribution of the  $\rho$  value for correlations of the rd29a gene expression vector with all genes of the AT genome.
