# Supplementary material for: XcisClique: analysis of regulatory bicliques
Source: PubMed Central journal article supplement (PMC1513260; doi:10.1186/1471-2105-7-218), 2006-04-21
Supplement: 1471-2105-7-218-S5.pdf [file 1471-2105-7-218-S5.pdf]

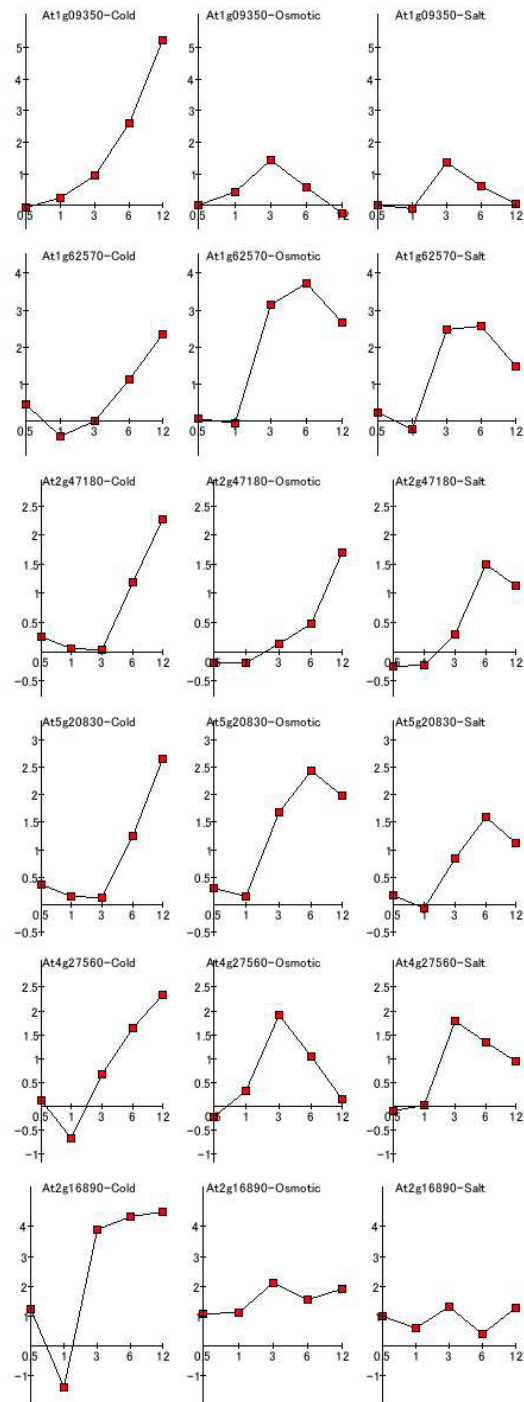

Supplementary Figure 5: Expression vectors for genes in Biclique 23

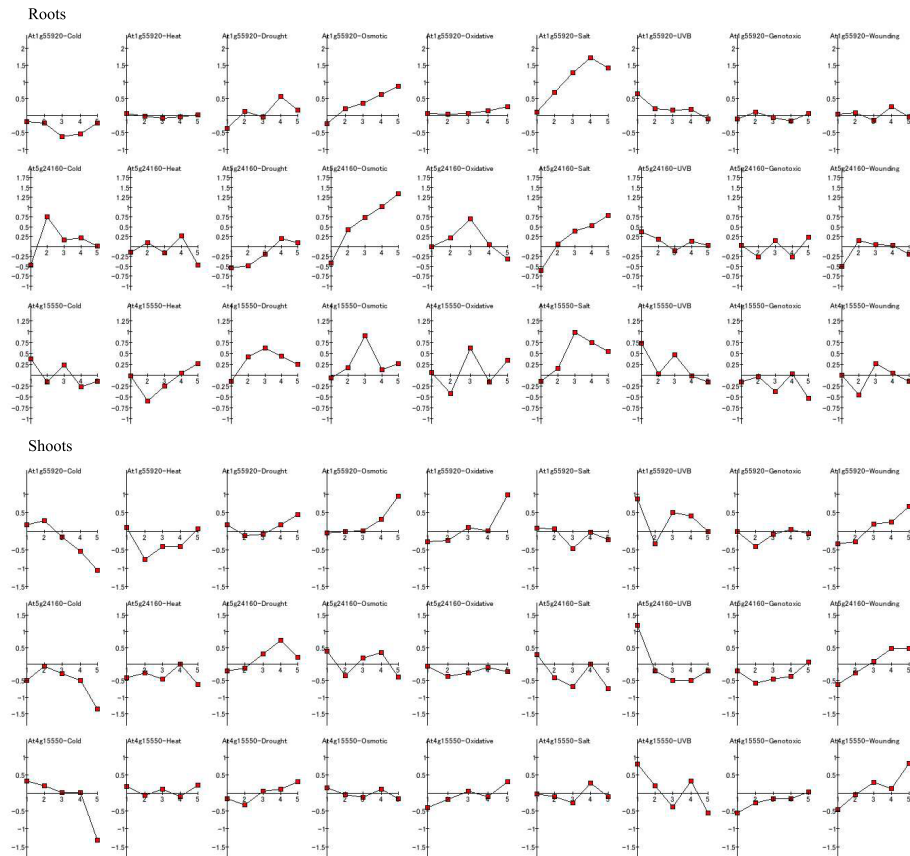

Supplementary Figure 6: Expression vectors for genes in Biclique 203
