# Supplementary material for: XcisClique: analysis of regulatory bicliques
Source: PubMed Central journal article supplement (PMC1513260; doi:10.1186/1471-2105-7-218), 2006-04-21
Supplement: 1471-2105-7-218-S6.pdf [file 1471-2105-7-218-S6.pdf]

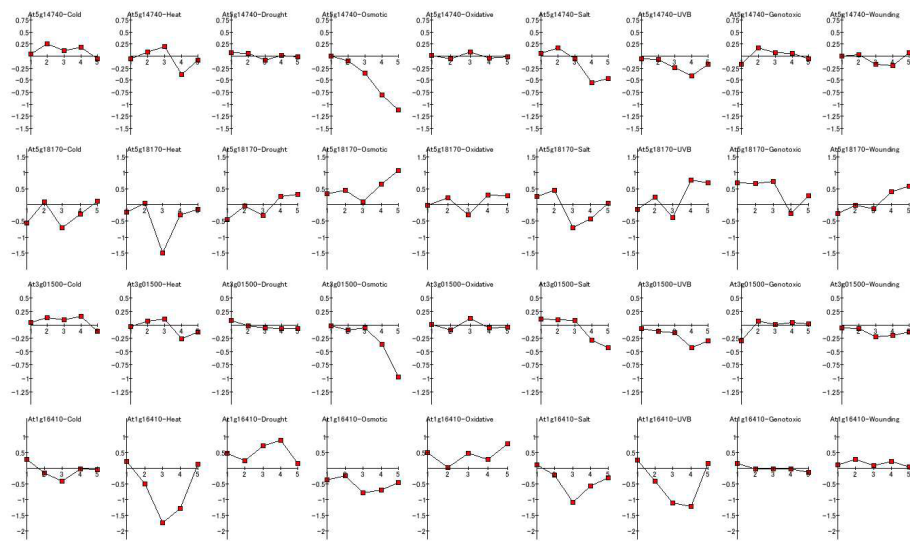

Supplementary Figure 7: Expression vectors for genes in Biclique 35

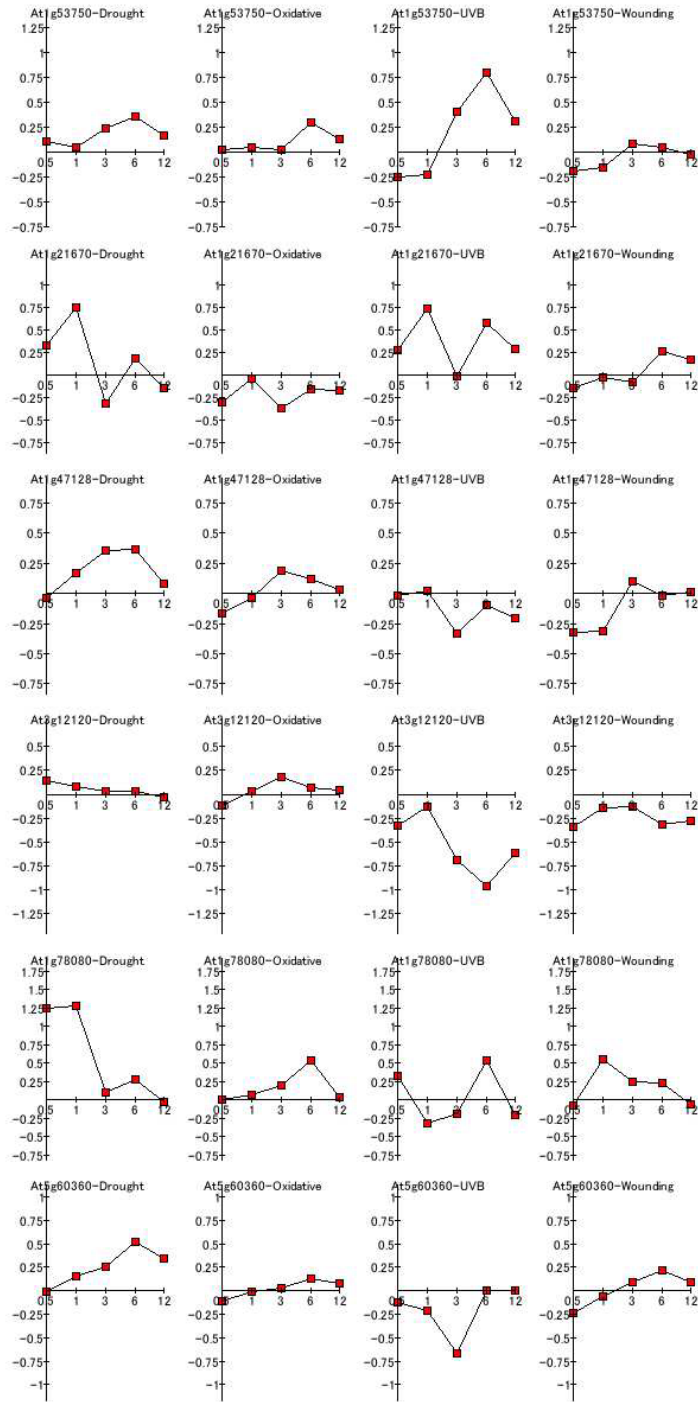

Supplementary Figure 8: Expression vectors for genes in Biclique 3854
