# Supplementary material for: XcisClique: analysis of regulatory bicliques
Source: PubMed Central journal article supplement (PMC1513260; doi:10.1186/1471-2105-7-218), 2006-04-21
Supplement: 1471-2105-7-218-S7.pdf [file 1471-2105-7-218-S7.pdf]

## Supplementary Tables

Supplementary Table 1: The 11 genes in the geneset for Case Study 1

| GENE ID   | ANNOTATION                                                          |
|-----------|---------------------------------------------------------------------|
| At1g62570 | flavin-containing monooxygenase family protein / FMO family protein |
| At1g09350 | galactinol synthase, putative                                       |
| At1g60470 | galactinol synthase, putative                                       |
| At2g47180 | galactinol synthase, putative                                       |
| At4g17090 | beta-amylase (CT-BMY) / 1,4-alpha-D-glucan maltohydrolase           |
| At5g20830 | sucrose synthase / sucrose-UDP glucosyltransferase (SUS1)           |
| At2g16890 | UDP-glucuronosyl/UDP-glucosyl transferase family protein            |
| At3g51240 | naringenin 3-dioxygenase / flavanone 3-hydroxylase (F3H)            |
| At3g55120 | chalcone-flavanone isomerase / chalcone isomerase (CHI)             |
| At4g27560 | glycosyltransferase family protein                                  |
| At5g08640 | flavonol synthase 1 (FLS1)                                          |

Supplementary Table 2: The 14 genes in the geneset for Case Study 2

| GENE ID   | ANNOTATION                                                        |
|-----------|-------------------------------------------------------------------|
| At5g18170 | glutamate dehydrogenase 1 (GDH1)                                  |
| At1g28670 | lipase                                                            |
| At2g35690 | acyl-CoA oxidase, putative                                        |
| At1g55920 | serine O-acetyltransferase, putative                              |
| At4g22690 | cytochrome P450 family protein                                    |
| At1g10360 | glutathione S-transferase, putative                               |
| At1g16410 | cytochrome P450, putative                                         |
| At2g22330 | cytochrome P450, putative                                         |
| At2g23600 | hydrolase, alpha/beta fold family protein                         |
| At2g29340 | short-chain dehydrogenase/reductase (SDR) family protein          |
| At4g15550 | UDP-glucose:indole-3-acetate beta-D-glucosyltransferase (IAGLU)   |
| At5g24160 | squalene monooxygenase 1,2 / squalene epoxidase 1,2 (SQP1,2)      |
| At5g14740 | carbonic anhydrase 2 / carbonate dehydratase 2 (CA2) (CA18)       |
| At3g01500 | carbonic anhydrase 1, chloroplast / carbonate dehydratase 1 (CA1) |

Supplementary Table 3: The 113 senescent-responsive genes in the geneset for Case Study 3

| GENE ID   | ANNOTATION                                                            |
|-----------|-----------------------------------------------------------------------|
| At1g07600 | metallothionein-like protein 1A (MT-1A) (MT-Q) (MT-2)                 |
| At1g09500 | cinnamyl-alcohol dehydrogenase family / CAD family                    |
| At1g13990 | expressed protein                                                     |
| At1g14400 | ubiquitin-conjugating enzyme 1 (UBC1)                                 |
| At1g18210 | calcium-binding protein, putative                                     |
| At1g19570 | dehydroascorbate reductase, putative                                  |
| At1g20620 | catalase 3 (SEN2)                                                     |
| At1g21670 | expressed protein                                                     |
| At1g30420 | ATP-binding cassette transport protein, putative                      |
| At1g30460 | zinc finger (CCCH-type) family protein / YT521-B-like family protein  |
| At1g35160 | 14-3-3 protein GF14 phi (GRF4)                                        |
| At1g47128 | cysteine proteinase (RD21A) / thiol protease                          |
| At1g51200 | zinc finger (AN1-like) family protein                                 |
| At1g52040 | jacalin lectin family protein                                         |
| At1g52880 | no apical meristem (NAM) family protein                               |
| At1g53580 | hydroxyacylglutathione hydrolase, putative / glyoxalase II, putative  |
| At1g53750 | 26S proteasome AAA-ATPase subunit (RPT1a)                             |
| At1g58360 | amino acid permease I (AAP1)                                          |
| At1g59870 | ABC transporter family protein                                        |
| At1g63010 | SPX (SYG1/Pho81/XPR1) domain-containing protein                       |
| At1g67840 | ATP-binding region, ATPase-like domain-containing protein             |
| At1g68820 | membrane protein, putative                                            |
| At1g70900 | expressed protein                                                     |
| At1g71950 | expressed protein                                                     |
| At1g73260 | trypsin and protease inhibitor family protein / Kunitz family protein |
| At1g73325 | trypsin and protease inhibitor family protein / Kunitz family protein |
| At1g73750 | expressed protein                                                     |

CONTINUED ON NEXT PAGE

Supplementary Table 3: Continued

| GENE ID   | ANNOTATION                                                                                                |
|-----------|-----------------------------------------------------------------------------------------------------------|
| At1g75280 | isoflavone reductase, putative                                                                            |
| At1g75380 | wound-responsive protein-related                                                                          |
| At1g78080 | AP2 domain-containing transcription factor RAP2.4                                                         |
| At1g78380 | glutathione S-transferase, putative                                                                       |
| At2g05540 | glycine-rich protein                                                                                      |
| At2g20860 | lipoic acid synthase (LIP1)                                                                               |
| At2g21660 | glycine-rich RNA-binding protein (GRP7)                                                                   |
| At2g21950 | SKP1 interacting partner 6 (SKIP6)                                                                        |
| At2g22240 | inositol-3-phosphate synthase isozyme 2 / myo-inositol-1-phosphate synthase 2 / MI-1-P synthase 2 / IPS 2 |
| At2g23980 | cyclic nucleotide-regulated ion channel / cyclic nucleotide-gated channel (CNGC6)                         |
| At2g25450 | 2-oxoglutarate-dependent dioxygenase, putative                                                            |
| At2g26560 | patatin, putative                                                                                         |
| At2g39900 | LIM domain-containing protein                                                                             |
| At2g42690 | lipase, putative                                                                                          |
| At2g43290 | calmodulin-like protein (MSS3)                                                                            |
| At2g43770 | transducin family protein / WD-40 repeat family protein                                                   |
| At2g45210 | auxin-responsive protein-related                                                                          |
| At3g02040 | glycerophosphoryl diester phosphodiesterase family protein                                                |
| At3g03720 | amino acid permease family protein                                                                        |
| At3g07590 | small nuclear ribonucleoprotein D1, putative / snRNP core protein D1, putative / Sm protein D1, putative  |
| At3g09390 | metallothionein protein, putative (MT2A)                                                                  |
| At3g12120 | omega-6 fatty acid desaturase, endoplasmic reticulum (FAD2) / delta-12 desaturase                         |
| At3g15580 | autophagy 8i (APG8i)                                                                                      |
| At3g15730 | phospholipase D alpha 1 / PLD alpha 1 (PLDALPHA1) (PLD1) / choline phosphatase 1                          |
| At3g16640 | translationally controlled tumor family protein                                                           |

CONTINUED ON NEXT PAGE

Supplementary Table 3: Continued

| GENE ID   | ANNOTATION                                                                                                                         |
|-----------|------------------------------------------------------------------------------------------------------------------------------------|
| At3g17790 | acid phosphatase type 5 (ACP5)                                                                                                     |
| At3g22600 | protease inhibitor/seed storage/lipid transfer protein (LTP) family protein                                                        |
| At3g23920 | beta-amylase, putative / 1,4-alpha-D-glucan maltohydrolase, putative                                                               |
| At3g25480 | rhodanese-like domain-containing protein                                                                                           |
| At3g25760 | early-responsive to dehydration stress protein (ERD12)                                                                             |
| At3g26100 | regulator of chromosome condensation (RCC1) family protein                                                                         |
| At3g44100 | MD-2-related lipid recognition domain-containing protein / ML domain-containing protein                                            |
| At3g44300 | nitrilase 2 (NIT2)                                                                                                                 |
| At3g44720 | prephenate dehydratase family protein                                                                                              |
| At3g46000 | actin-depolymerizing factor, putative (ADF2)                                                                                       |
| At3g48000 | aldehyde dehydrogenase (ALDH2)                                                                                                     |
| At3g51130 | expressed protein                                                                                                                  |
| At3g51730 | sapoin B domain-containing protein                                                                                                 |
| At3g52800 | zinc finger (AN1-like) family protein                                                                                              |
| At3g55430 | glycosyl hydrolase family 17 protein / beta-1,3-glucanase, putative                                                                |
| At3g62550 | universal stress protein (USP) family protein                                                                                      |
| At4g01610 | cathepsin B-like cysteine protease, putative                                                                                       |
| At4g03280 | cytochrome B6-F complex iron-sulfur subunit, chloroplast / Rieske iron-sulfur protein / plastoquinol-plastocyanin reductase (petC) |
| At4g11360 | zinc finger (C3HC4-type RING finger) family protein (RHA1b)                                                                        |
| At4g11600 | glutathione peroxidase, putative                                                                                                   |
| At4g11910 | expressed protein                                                                                                                  |
| At4g12290 | copper amine oxidase, putative                                                                                                     |
| At4g13250 | short-chain dehydrogenase/reductase (SDR) family protein                                                                           |
| At4g16190 | cysteine proteinase, putative                                                                                                      |
| At4g16740 | terpene synthase/cyclase family protein                                                                                            |
| At4g18280 | glycine-rich cell wall protein-related                                                                                             |

CONTINUED ON NEXT PAGE

Supplementary Table 3: Continued

| GENE ID   | ANNOTATION                                                                                                      |
|-----------|-----------------------------------------------------------------------------------------------------------------|
| At4g24220 | expressed protein                                                                                               |
| At4g27020 | expressed protein                                                                                               |
| At4g27830 | glycosyl hydrolase family 1 protein                                                                             |
| At4g30210 | NADPH-cytochrome p450 reductase, putative /<br>NADPH-ferrihemoprotein reductase, putative                       |
| At4g30270 | MERI-5 protein (MERI-5) (MERI5B) / endo-xyloglucan transferase<br>/ xyloglucan endo-1,4-beta-D-glucanase (SEN4) |
| At4g30440 | NAD-dependent epimerase/dehydratase family protein                                                              |
| At4g32940 | vacuolar processing enzyme gamma / gamma-VPE                                                                    |
| At4g35750 | Rho-GTPase-activating protein-related                                                                           |
| At4g37390 | auxin-responsive GH3 family protein                                                                             |
| At4g37990 | mannitol dehydrogenase, putative (ELI3-2)                                                                       |
| At4g39090 | cysteine proteinase RD19a (RD19A) / thiol protease                                                              |
| At4g39670 | expressed protein                                                                                               |
| At5g01600 | ferritin 1 (FER1)                                                                                               |
| At5g02380 | metallothionein protein 2B (MT-2B)                                                                              |
| At5g08410 | ferredoxin-thioredoxin reductase, putative                                                                      |
| At5g10650 | zinc finger (C3HC4-type RING finger) family protein                                                             |
| At5g10860 | CBS domain-containing protein                                                                                   |
| At5g11520 | aspartate aminotransferase, chloroplast / transaminase A (ASP3)<br>(YLS4)                                       |
| At5g13170 | nodulin MtN3 family protein                                                                                     |
| At5g17220 | glutathione S-transferase, putative                                                                             |
| At5g18100 | superoxide dismutase [Cu-Zn] / copper/zinc superoxide dismutase<br>(CSD3)                                       |
| At5g19540 | expressed protein                                                                                               |
| At5g24160 | squalene monooxygenase 1,2 / squalene epoxidase 1,2 (SQP1,2)                                                    |
| At5g24770 | vegetative storage protein 2 (VSP2)                                                                             |
| At5g24780 | vegetative storage protein 1 (VSP1)                                                                             |
| At5g34850 | calcineurin-like phosphoesterase family protein                                                                 |

CONTINUED ON NEXT PAGE

Supplementary Table 3: Continued

| GENE ID   | ANNOTATION                                                                                |
|-----------|-------------------------------------------------------------------------------------------|
| At5g43850 | acireductone dioxygenase (ARD/ARD') family protein                                        |
| At5g48380 | leucine-rich repeat family protein / protein kinase family protein                        |
| At5g53350 | ATP-dependent Clp protease ATP-binding subunit ClpX1 (CLPX)                               |
| At5g53730 | harpin-induced family protein / HIN1 family protein /<br>harpin-responsive family protein |
| At5g54250 | cyclic nucleotide-regulated ion channel / cyclic nucleotide-gated<br>channel (CNGC4)      |
| At5g57655 | xylose isomerase family protein                                                           |
| At5g59310 | lipid transfer protein 4 (LTP4)                                                           |
| At5g60360 | cysteine proteinase, putative / AALP protein (AALP)                                       |
| At1g05340 | expressed protein                                                                         |

CONCLUDED
